# Supplementary material for: Correlating the size and cation inversion factor in context of magnetic and optical behavior of CoFe2O4 nanoparticles
Source: Royal Society of Chemistry journal article supplement (doi:10.1039/d0ra01653e), 2020-01-01
Supplement: d0ra01653e1.pdf [file d0ra01653e1.pdf]

**Correlating the Size and Cation Inversion Factor in Context of Magnetic and Optical behavior of CoFe<sub>2</sub>O<sub>4</sub> nanoparticles**

Jitendra Pal Singh<sup>a,\*</sup>, Jae Yeon Park<sup>b</sup>, Varsha Singh<sup>c</sup>, So Hee Kim<sup>c</sup>, Weon Cheol Lim<sup>c</sup>, Hemaunt Kumar<sup>d</sup>, Y. H. Kim<sup>a</sup>, Sangsul Lee<sup>a,e#</sup> and Keun Hwa Chae<sup>c</sup>

*<sup>a</sup>Pohang Accelerator Lab, Pohang University of Science and Technology, Pohang-37673, Republic of Korea*

*<sup>b</sup>Radiation Equipment Research Division, Korea Atomic Energy Research Institute, Jeongup-56212, Republic of Korea*

*<sup>c</sup>Advanced Analysis Center, Korea Institute of Science and Technology, Seoul-02792, Republic of Korea*

*<sup>d</sup>Department of Applied Sciences, Rajkiya Engineering College Bijnor-246725, India*

*<sup>e</sup>Xavisoptics, Ltd., Pohang 37673, Republic of Korea*

Supplementary Information

**Table S1:** Variation in X-ray Energy for Measuring Fe *K*-edge and Co *K*-edge XANES-Imaging Spectra

| <b>Element</b> | <b>Variation from Main Edge</b> | <b>Actual Variation (eV)</b> | <b>Step (eV)</b> |
|----------------|---------------------------------|------------------------------|------------------|
| Fe             | -20 to 80                       | 7092 to 7192                 | 1                |
| Co             | -20 to 80                       | 7689 to 7789                 | 1                |

**Table S2:** Input files for A-site and B-site occupancies of metal ions in CoFe<sub>2</sub>O<sub>4</sub> nanoparticles

| <b>A-site</b>                                                  |         |           |            |             |       |             |
|----------------------------------------------------------------|---------|-----------|------------|-------------|-------|-------------|
| ## This Atoms file was generated by Demeter 0.9.18             |         |           |            |             |       |             |
| ## Demeter written by and copyright (c) Bruce Ravel, 2006-2013 |         |           |            |             |       |             |
| Space = fd3m                                                   |         |           |            |             |       |             |
| a                                                              | =       | 8.3858299 | b          | = 8.3858299 | c     | = 8.3858299 |
| alpha                                                          | =       | 90.00000  | beta       | = 90.00000  | gamma | = 90.00000  |
| r <sub>max</sub>                                               | =       | 8.00000   | core = Fe1 |             |       |             |
| shift                                                          | =       | 0.00000   | 0.00000    | 0.00000     |       |             |
| atoms                                                          |         |           |            |             |       |             |
| # el.                                                          | x       | y         | z          | tag         |       |             |
| Co                                                             | 0.12500 | 0.12500   | 0.12500    | CoA         |       |             |
| Fe                                                             | 0.50000 | 0.50000   | 0.50000    | FeA         |       |             |
| O                                                              | 0.26000 | 0.26000   | 0.26000    | O           |       |             |
| <b>B-site</b>                                                  |         |           |            |             |       |             |
| ## This Atoms file was generated by Demeter 0.9.18             |         |           |            |             |       |             |
| ## Demeter written by and copyright (c) Bruce Ravel, 2006-2013 |         |           |            |             |       |             |
| Space = fd3m                                                   |         |           |            |             |       |             |
| a                                                              | =       | 8.3858299 | b          | = 8.3858299 | c     | = 8.3858299 |
| alpha                                                          | =       | 90.00000  | beta       | = 90.00000  | gamma | = 90.00000  |
| r <sub>max</sub>                                               | =       | 8.00000   | core = Co1 |             |       |             |
| shift                                                          | =       | 0.00000   | 0.00000    | 0.00000     |       |             |
| atoms                                                          |         |           |            |             |       |             |
| # el.                                                          | x       | y         | z          | tag         |       |             |
| Fe                                                             | 0.12500 | 0.12500   | 0.12500    | FeB         |       |             |
| Co                                                             | 0.50000 | 0.50000   | 0.50000    | CoB         |       |             |
| O                                                              | 0.26000 | 0.26000   | 0.26000    | O           |       |             |

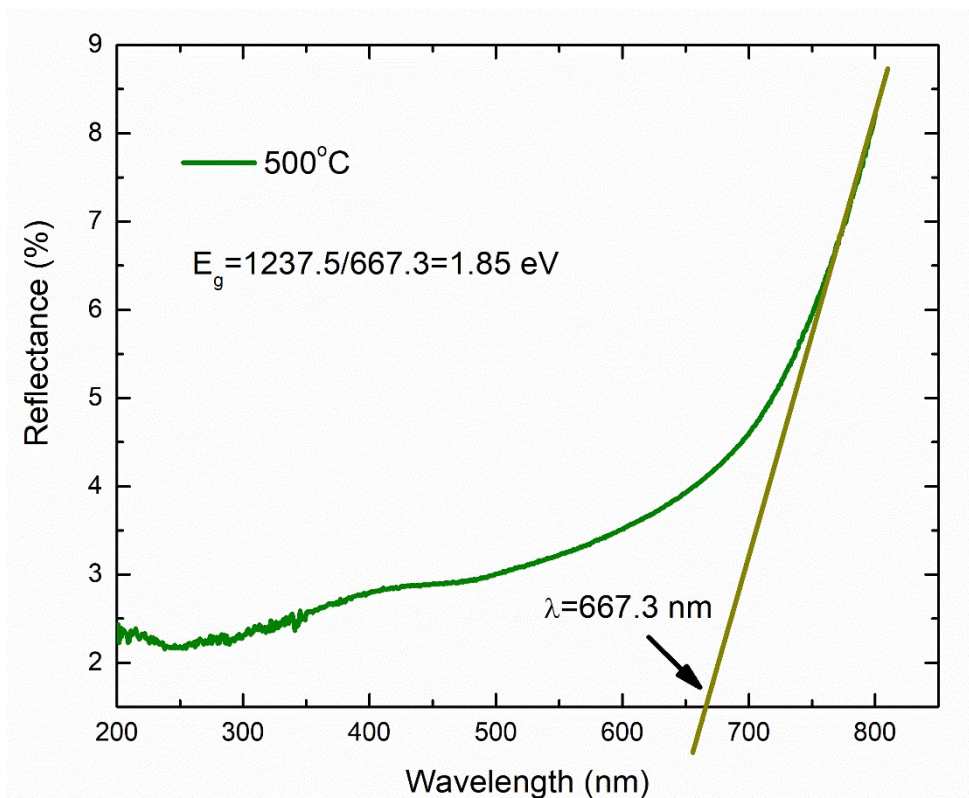

**Fig. S1: Estimation of optical band-gap from diffuse reflectance spectrum for representative nanoparticle**

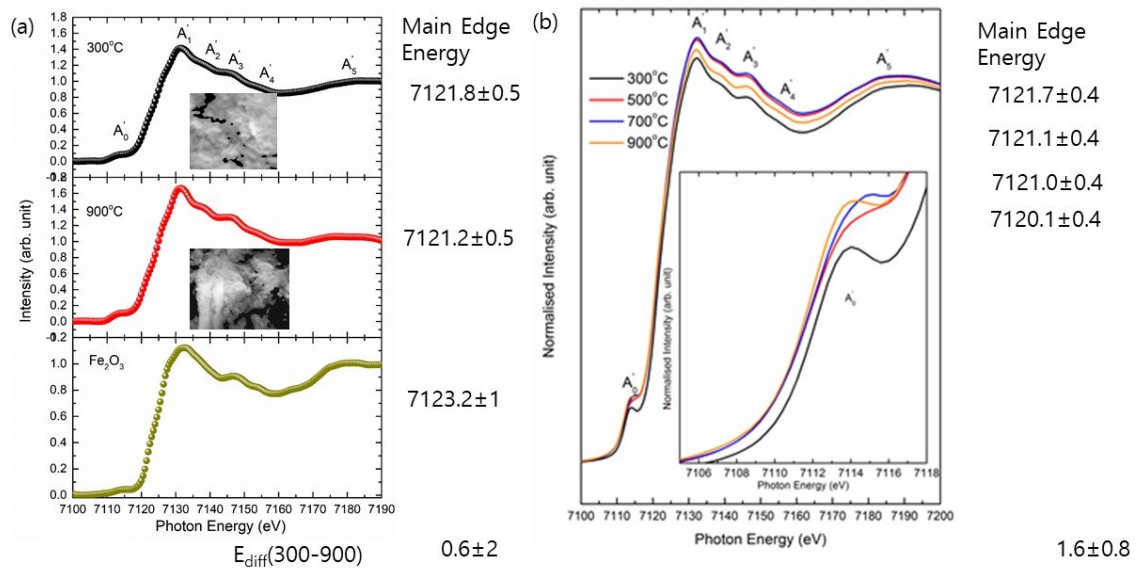

**Fig. S2: Fe K-edge (a) XANES spectra extracted from transmission X-ray microscopic imaging and (b) bulk XANES spectra for CoFe<sub>2</sub>O<sub>4</sub> nanoparticles.**

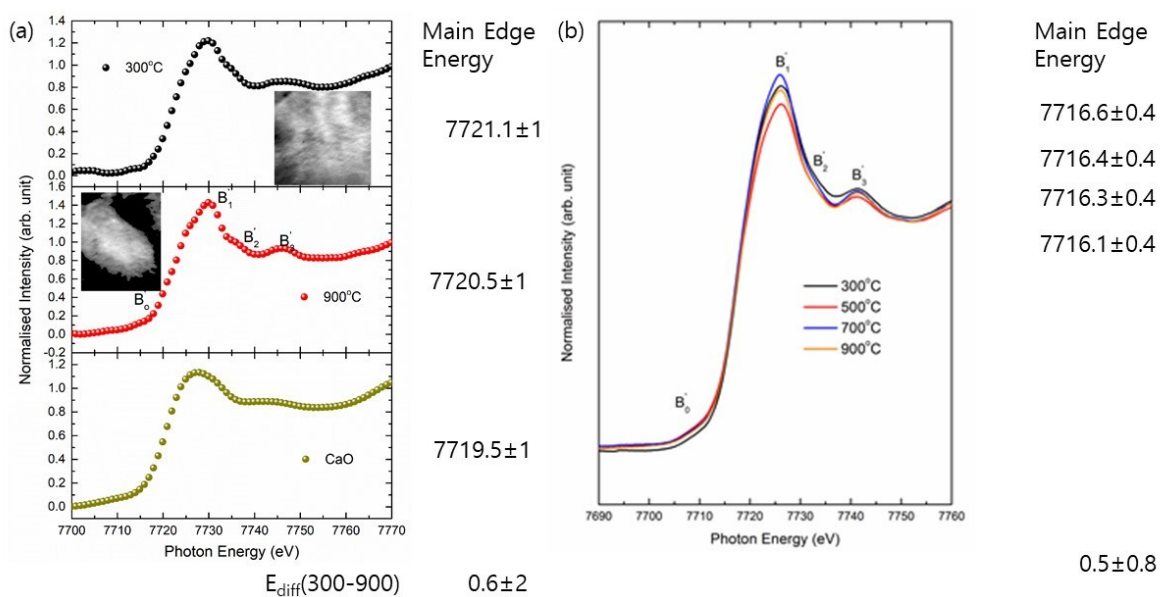

**Fig. S3: Co K-edge (a) XANES spectra extracted from transmission X-ray microscopic imaging and (b) bulk XANES spectra for CoFe<sub>2</sub>O<sub>4</sub> nanoparticles. (The main energy difference for same sample by two methods is due to calibration related issues.)**

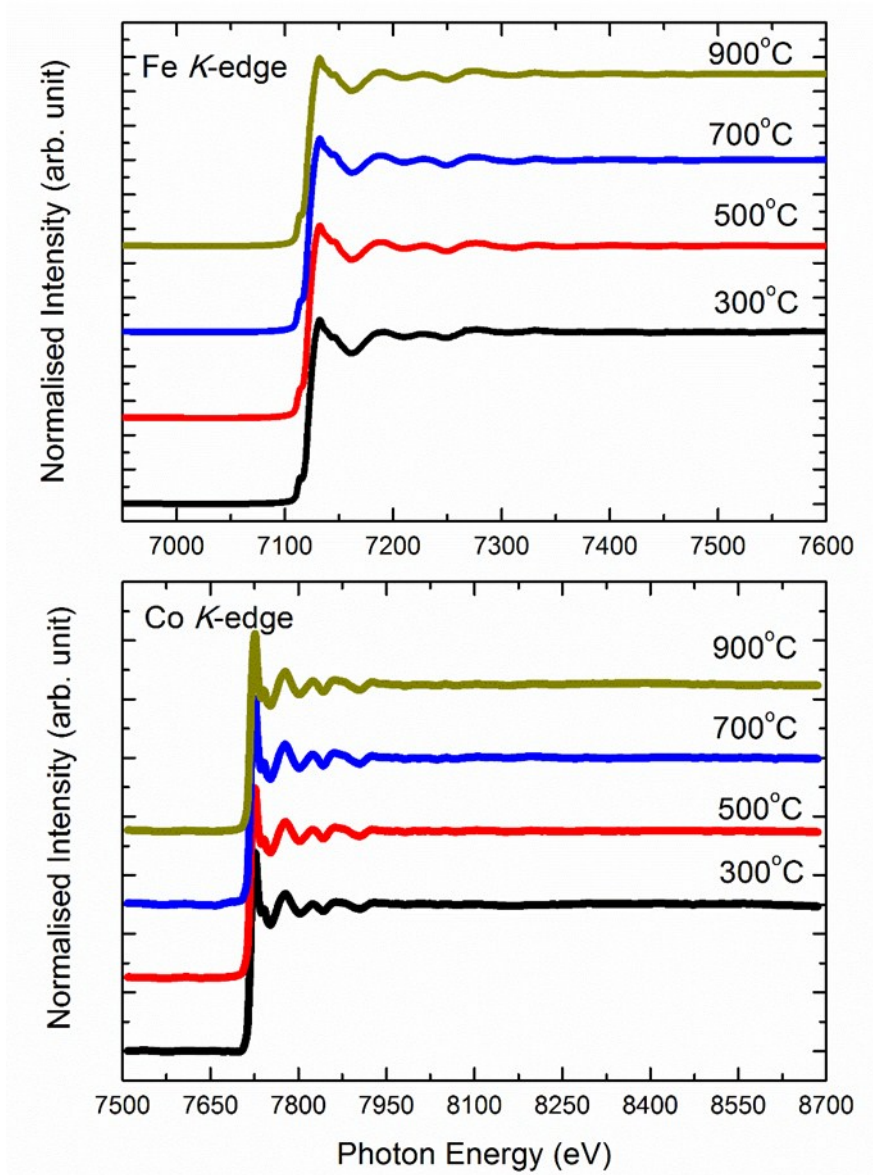

**Fig. S4: Fe & Co K-edge EXAFS spectra for  $\text{CoFe}_2\text{O}_4$  nanoparticles synthesized at 300, 500, 700 and 900°C**

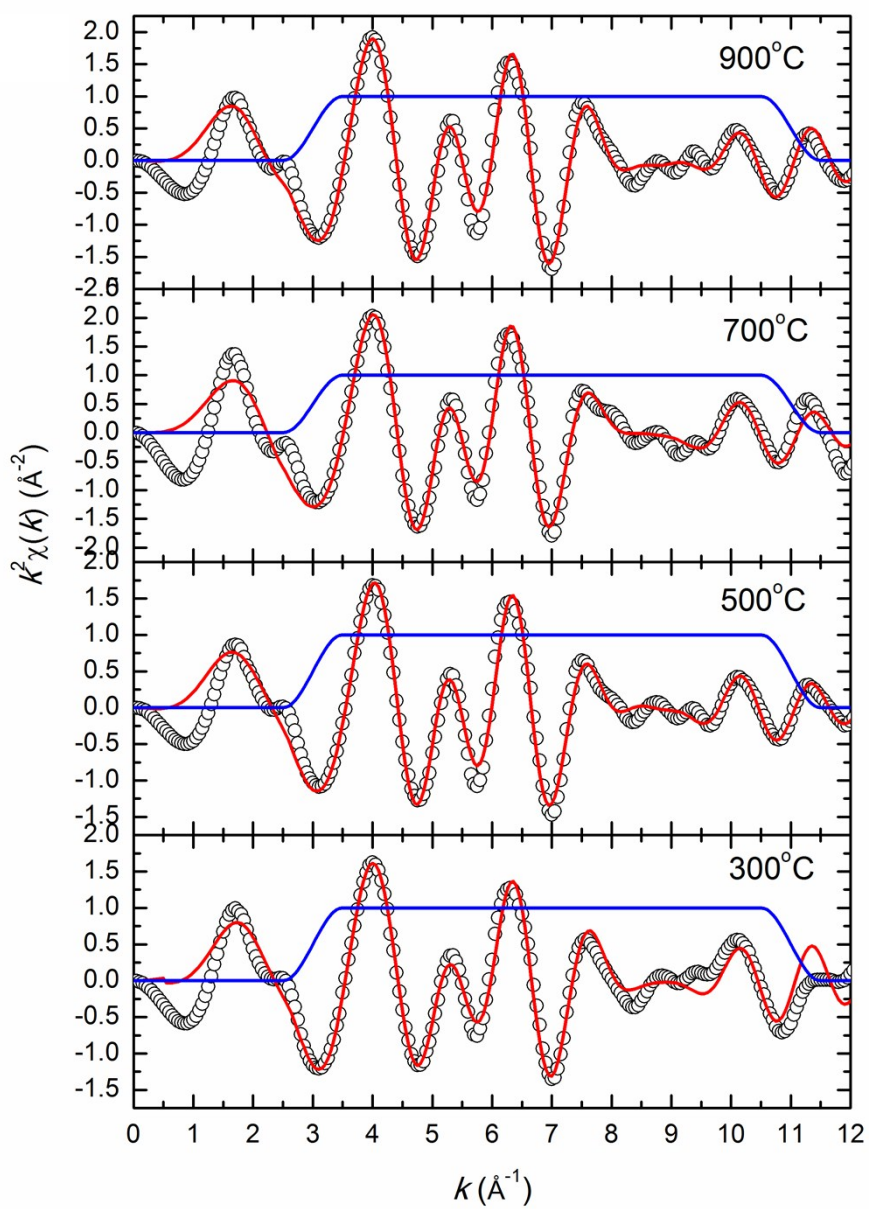

**Figure S5: Simulated  $k$ -weight Co  $K$ -edge EXAFS spectra for  $\text{CoFe}_2\text{O}_4$  nanoparticles synthesized at 300, 500, 700 and 900°C.**



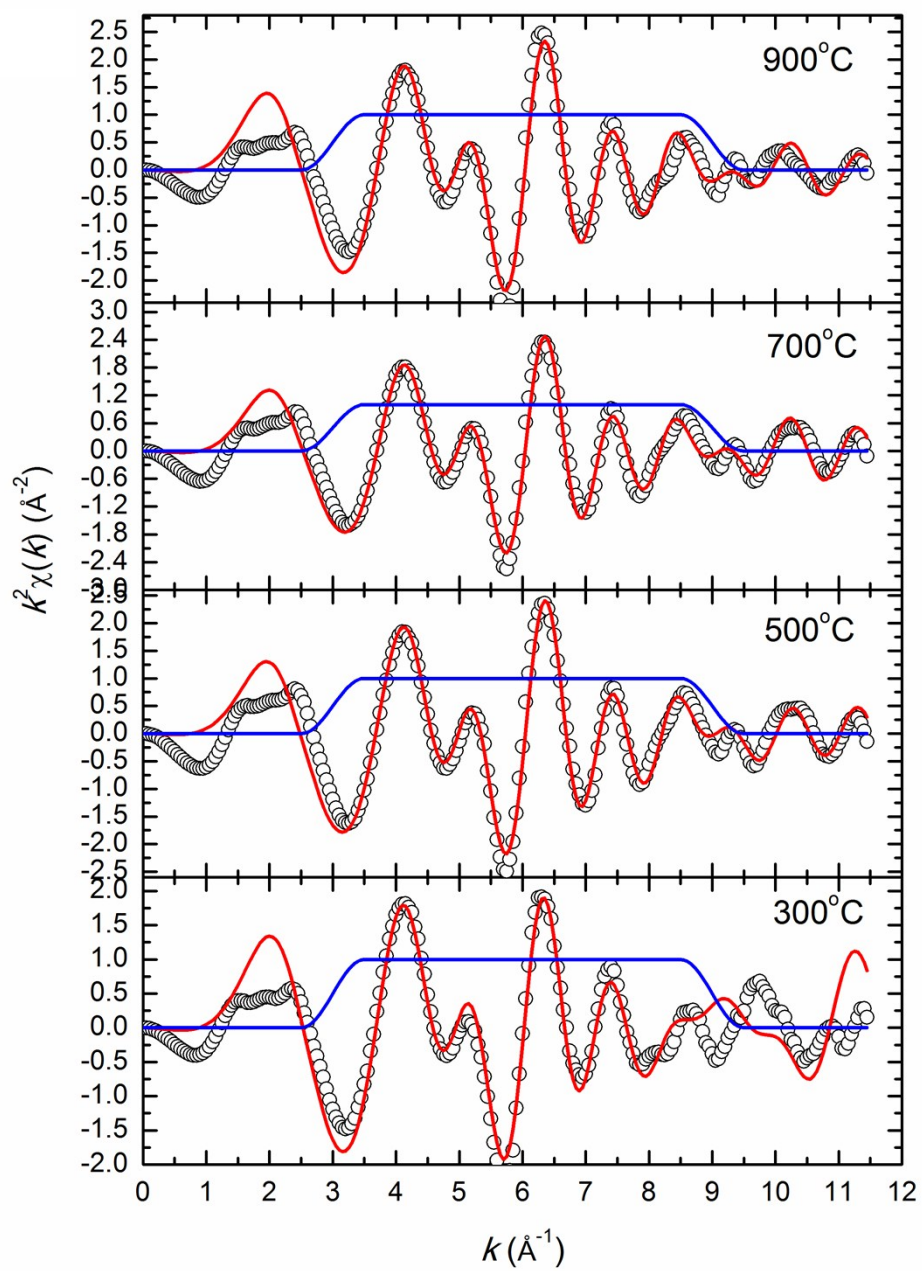

**Figure S6: Simulated  $k$ -weight EXAFS spectra at Fe  $K$ -edge for  $\text{CoFe}_2\text{O}_4$  nanoparticles synthesized at 300, 500, 700 and 900°C**
